# Supplementary material for: Redox activity of thioredoxin z and fructokinase-like protein 1 is dispensable for autotrophic growth of Arabidopsis thaliana
Source: PubMed Central journal article supplement (PMC4036507; doi:10.1093/jxb/eru122), 2014-03-22
Supplement: supp_eru122_jexbot120238_file001.pdf [file supp_eru122_jexbot120238_file001.pdf]

**Supplemental Table 1: Nucleotide sequences of gene-specific primers.**Nucleotide sequence of gene-specific primers for construction of the TRX z *E. coli* expression construct

|                        |     |                                                      |
|------------------------|-----|------------------------------------------------------|
| Trx z His <sub>6</sub> | Fwd | 5'- GGATCCCATCATCATCATCATCATGGCAAGTTTGTC AGAGAA - 3' |
|                        | Rev | 5'- GTCGACTCACATCTCGTTGTCAATGATATC- 3'               |

Nucleotide sequence of gene-specific primers used to confirm T-DNA insertion (Salk 028162)

|           |     |                                |
|-----------|-----|--------------------------------|
| 028162_LP |     | 5'-CCAACTACGCGACAAGGTATC-3'    |
| 028162_RP |     | 5'-TTTTCCACACCTCAACACTCC-3'    |
| LBb1.3    |     | 5'-ATTTTGCCGATTTCCGGAAC-3'     |
| trx z     | Fwd | 5'-GCAGTAGAGTATGAGAGCAATGCA-3' |
|           | Rev | 5'-CATCTCGTTGTCAATGATATCGTG-3' |
| ubq       | Fwd | 5'-ATGCAGATYTTTGTGAAGAC-3'     |
|           | Rev | 5'-ACCACCACGRAGACGGAG-3'       |

Nucleotide sequence of gene-specific primers for used to confirm T-DNA insertion (GABI-Kat 443A08)

|             |     |                                    |
|-------------|-----|------------------------------------|
| 443A08_LP   |     | 5'-CAAATAGCGAGTCCTCAGGTG-3'        |
| 443A08_RP   |     | 5'-GATCAATTCCCACAAGGAAGC-3'        |
| o8474       |     | 5'-ATAATAACGCTGCGGACATCTACATTTT-3' |
| <i>fln1</i> | Fwd | 5'-CAAGATCAAGTTTAAGGACGG-3'        |
|             | Rev | 5'-GTTCCATCAGTCACAACCAG-3'         |

Nucleotide sequence of gene-specific primers for construction of the 35S:TRX z vector

|            |     |                                 |
|------------|-----|---------------------------------|
| TRX z cDNA | Fwd | 5'-GGATCCGCAAGTTTGTTCAGAGAAG-3' |
|            | Rev | 5'-TCACATCTCGTTGTCAATGATATC-3'  |

Nucleotide sequence of gene-specific primers for construction of the 35S:FLN1 vector

|           |     |                                  |
|-----------|-----|----------------------------------|
| FLN1 cDNA | Fwd | 5'-CACCATGGCTTCACTTCTTATTTTCC-3' |
|           | Rev | 5'-TGCCACATTGATGGAACATAAACTTG-3' |

Nucleotide sequence of gene-specific primers used for site-directed mutagenesis

|                  |     |                                                       |
|------------------|-----|-------------------------------------------------------|
| FLN1 C105A/C106A | Fwd | 5'-ACGACGATCCGCCTCTTGTGGCTGCCTTCGGAGCTGTACAGAAGGA-3'  |
|                  | Rev | 5'-TCCTTCTGTACAGCTCCGAAGGCAGCCACAAGAGGGCGGATCGTCGT-3' |
| TRX z C106S      | Fwd | 5'-GATTTTTATGCGACATGGAGTGGACCTTGTATCTTG-3'            |
|                  | Rev | 5'-CAAGATAACAAGGTCCACTCCATGTGCATAAAAATC-3'            |
| TRX z C109S      | Fwd | 5'-CATGGTGTGGACCTAGTATCTTGATGGCCCAG-3'                |
|                  | Rev | 5'-CTGGGCCATCAAGATACTAGGTCCACACCATG-3'                |

Nucleotide sequence of gene-specific primers used for qPCR and RT-PCR

|         |     |                               |
|---------|-----|-------------------------------|
| psaA At | Fwd | 5'-CTACTTTGCCACCCACTGC-3'     |
|         | Rev | 5'-TGAGTGCTTTAGGGCGTCC-3'     |
| psbA At | Fwd | 5'-GCATAGCACTGAATAGGGAGCCG-3' |

|                                                                                             |     |                                         |
|---------------------------------------------------------------------------------------------|-----|-----------------------------------------|
|                                                                                             | Rev | 5'-GCGACCTTGGATTGCTGTTGC-3'             |
| psbK At                                                                                     | Fwd | 5'-AGTCGCCAAATTGCCAGAGG-3'              |
|                                                                                             | Rev | 5'-AGCTTGCCAAACAAAGGCTAA-3'             |
| rbcL At                                                                                     | Fwd | 5'-TTGGCAGCATTCCGAGTAACTCCT-3'          |
|                                                                                             | Rev | 5'-CTGGTAAGTCCATCGGTCC-3'               |
| clpP At                                                                                     | Fwd | 5'-GGAGGAGCAATTACCAAACG-3'              |
|                                                                                             | Rev | 5'-GCTTGGGCTTCTGTTGCTGAC-3'             |
| ndhB At                                                                                     | Fwd | 5'-GGTCTAATGAGGCTACTATG-3'              |
|                                                                                             | Rev | 5'-CAAGAGAAACCATGAACCAGA-3'             |
| accD At                                                                                     | Fwd | 5'-GAAGGTTCAACAAGCGGCTG-3'              |
|                                                                                             | Rev | 5'-GAAATAACTCGCTCAGAACAC-3'             |
| rpoA At                                                                                     | Fwd | 5'-TGCGATGCGAAGAGCTTTAC-3'              |
|                                                                                             | Rev | 5'-CAATGATTTCCACAGCGGG-3'               |
| rpoB At                                                                                     | Fwd | 5'-GCGAAAGAATCCTCCTATGC-3'              |
|                                                                                             | Rev | 5'-CCACCTCACATCAATAACTC-3'              |
| psaE At                                                                                     | Fwd | 5'-CGTGTCTTTCTTGCCGATGA-3'              |
|                                                                                             | Rev | 5'-TGGGTTTGGTGGCAGTAGC-3'               |
| psaH At                                                                                     | Fwd | 5'-GCTAATGGTGTGGTGGCTAA-3'              |
|                                                                                             | Rev | 5'-GGATTGTAAGGAGAAGGAGC-3'              |
| psbO At                                                                                     | Fwd | 5'-CAGCCTCTCTCCAATCCAC-3'               |
|                                                                                             | Rev | 5'-GAGGTGGCAAGAGCGAATC-3'               |
| trxf1 At                                                                                    | Fwd | 5'-GTGACGGAGGTCGATAAGGA-3'              |
|                                                                                             | Rev | 5'-AATGGCCGGTTATCTGGATT-3'              |
| trxx At                                                                                     | Fwd | 5'-CTAACC GCCACCTGCTTTC-3'              |
|                                                                                             | Rev | 5'-GCACCAAGTAGCGACGAAT-3'               |
| trxz At                                                                                     | Fwd | 5'-TTATGCGACATGGTGTGGAC-3'              |
|                                                                                             | Rev | 5'-CCCTTCTGTCCTGATTGCAT-3'              |
| fln1 At                                                                                     | Fwd | 5'-CGCCATTCACAAGCATCAAGG-3'             |
|                                                                                             | Rev | 5'-CTTCTTCTTCCCTTTGC-3'                 |
| fln2 At                                                                                     | Fwd | 5'-ACCGAGAAGAAAGTGAGACG-3'              |
|                                                                                             | Rev | 5'-CATCACTAACCTCAGCATCC-3'              |
| 18S rRNA At                                                                                 | Fwd | 5'-AAACCCCGACTTATGGAAGG-3'              |
|                                                                                             | Rev | 5'-CGAACCCCTAATTCTCCGTCA-3'             |
| Nucleotide sequence of gene-specific primers used for generation of GUS-promoter constructs |     |                                         |
| Trx z promoter                                                                              | Fwd | 5'-CACCCAGTTTGGAGGGAATCAAGCTCC-3'       |
|                                                                                             | Rev | 5'-GGATCCTTTGGAAATCGATTTCTGCTTCAAATG-3' |
| FLN1 promoter                                                                               | Fwd | 5'-CACCATGTCCAGAAGCCCATTCTTTTCTG-3'     |
|                                                                                             | Rev | 5'-TCCTGATGGGTTTTTGACACCACTGTG-3'       |

|               |     |                                     |
|---------------|-----|-------------------------------------|
| FLN2 promoter | Fwd | 5'-CACCGAACTTGTTGTGTTATCCAAGTACC-3' |
|               | Rev | 5'-GGATCCCAAATAAGAGCTCTTTTCAAACG-3' |
